# Supplementary material for: Un calcul révolutionnaire
Source: Hindawi journal article supplement (doi:10.1155/2020/6795392), 2008-01-25
Supplement: f1 [file 6795392.f1.pdf]

Supplementary Table 1. List of selected probes and associated genes in breast cancer dataset (sample results)

| LASSO-cv1   |                            | LASSO-pcv1  |               | Elastic net |                 | BSS enet    |                            | Coxboost    |                 | RSF         |                 |
|-------------|----------------------------|-------------|---------------|-------------|-----------------|-------------|----------------------------|-------------|-----------------|-------------|-----------------|
| 200800_s_at | HSPA1A///HSPA1B            | 200670_at   | XBP1          | 200670_at   | XBP1            | 200800_s_at | HSPA1A///HSPA1B            | 200670_at   | XBP1            | 200632_s_at | NDRG1           |
| 200920_s_at | BTG1                       | 201195_s_at | SLC7A5        | 200800_s_at | HSPA1A///HSPA1B | 201195_s_at | SLC7A5                     | 200800_s_at | HSPA1A///HSPA1B | 200800_s_at | HSPA1A///HSPA1B |
| 200985_s_at | CD59                       | 201925_s_at | CD55          | 200884_at   | CKB             | 201325_s_at | EMP1                       | 200920_s_at | BTG1            | 200989_at   | HIF1A           |
| 201195_s_at | SLC7A5                     | 202769_at   | CCNG2         | 200920_s_at | BTG1            | 201912_s_at | GSPT1                      | 200985_s_at | CD59            | 201131_s_at | CDH1            |
| 201325_s_at | EMP1                       | 203510_at   | MET           | 200985_s_at | CD59            | 201925_s_at | CD55                       | 201195_s_at | SLC7A5          | 201160_s_at | YBX3            |
| 201876_at   | PON2                       | 203929_s_at | MAPT          | 201195_s_at | SLC7A5          | 202203_s_at | AMFR                       | 201287_s_at | SDC1            | 201195_s_at | SLC7A5          |
| 201911_s_at | FARP1                      | 205862_at   | GREB1         | 201287_s_at | SDC1            | 202651_at   | LPGAT1                     | 201876_at   | PON2            | 201286_at   | SDC1            |
| 201912_s_at | GSPT1                      | 206042_x_at | SNRPN///SNURF | 201325_s_at | EMP1            | 202824_s_at | TCEB1                      | 201912_s_at | GSPT1           | 201324_at   | EMP1            |
| 201925_s_at | CD55                       | 212492_s_at | KDM4B         | 201876_at   | PON2            | 202888_s_at | ANPEP                      | 201925_s_at | CD55            | 201325_s_at | EMP1            |
| 202035_s_at | SFRP1                      | 212593_s_at | PDCD4         | 201911_s_at | FARP1           | 203243_s_at | PDLIM5                     | 202035_s_at | SFRP1           | 201397_at   | PHGDH           |
| 202203_s_at | AMFR                       | 217838_s_at | EVL           | 201912_s_at | GSPT1           | 203510_at   | MET                        | 202203_s_at | AMFR            | 201589_at   | SMC1A           |
| 202314_at   | CYP51A1///LRRD1            | 219922_s_at | LTBP3         | 201925_s_at | CD55            | 203814_s_at | NQO2                       | 202314_at   | CYP51A1///LRRD1 | 201849_at   | BNIP3           |
| 202769_at   | CCNG2                      | 221589_s_at | ALDH6A1       | 202035_s_at | SFRP1           | 203928_x_at | MAPT                       | 202651_at   | LPGAT1          | 201876_at   | PON2            |
| 202824_s_at | TCEB1                      |             |               | 202203_s_at | AMFR            | 203953_s_at | CLDN3                      | 202769_at   | CCNG2           | 202016_at   | MEST            |
| 203153_at   | IFIT1                      |             |               | 202314_at   | CYP51A1///LRRD1 | 204379_s_at | FGFR3                      | 202824_s_at | TCEB1           | 202454_s_at | ERBB3           |
| 203243_s_at | PDLIM5                     |             |               | 202351_at   | ITGAV           | 204641_at   | NEK2                       | 203153_at   | IFIT1           | 202600_s_at | NRIP1           |
| 203510_at   | MET                        |             |               | 202651_at   | LPGAT1          | 204942_s_at | ALDH3B2                    | 203243_s_at | PDLIM5          | 202856_s_at | SLC16A3         |
| 203814_s_at | NQO2                       |             |               | 202769_at   | CCNG2           | 204992_s_at | PFN2                       | 203510_at   | MET             | 202862_at   | FAH             |
| 203910_at   | ARHGAP29                   |             |               | 202824_s_at | TCEB1           | 205030_at   | FABP7                      | 203814_s_at | NQO2            | 202870_s_at | CDC20           |
| 204379_s_at | FGFR3                      |             |               | 203153_at   | IFIT1           | 205051_s_at | KIT                        | 203910_at   | ARHGAP29        | 202887_s_at | DDIT4           |
| 204992_s_at | PFN2                       |             |               | 203243_s_at | PDLIM5          | 205242_at   | CXCL13                     | 204379_s_at | FGFR3           | 202888_s_at | ANPEP           |
| 205030_at   | FABP7                      |             |               | 203510_at   | MET             | 205573_s_at | SNX7                       | 204992_s_at | PFN2            | 202890_at   | MAP7            |
| 205047_s_at | ASNS                       |             |               | 203814_s_at | NQO2            | 205862_at   | GREB1                      | 205030_at   | FABP7           | 203126_at   | IMPA2           |
| 205242_at   | CXCL13                     |             |               | 203910_at   | ARHGAP29        | 206042_x_at | SNRPN///SNURF              | 205047_s_at | ASNS            | 203335_at   | PHYH            |
| 205862_at   | GREB1                      |             |               | 203929_s_at | MAPT            | 206373_at   | ZIC1                       | 205051_s_at | KIT             | 203510_at   | MET             |
| 206042_x_at | SNRPN///SNURF              |             |               | 204070_at   | RARRES3         | 207414_s_at | PCSK6                      | 205242_at   | CXCL13          | 203535_at   | S100A9          |
| 206560_s_at | MIA                        |             |               | 204379_s_at | FGFR3           | 207469_s_at | PIR<br>ITGB6///LOC10050598 | 205862_at   | GREB1           | 203638_s_at | FGFR2           |
| 207414_s_at | PCSK6                      |             |               | 204641_at   | NEK2            | 208083_s_at | 4                          | 206042_x_at | SNRPN///SNURF   | 203710_at   | ITPR1           |
| 207469_s_at | PIR<br>ITGB6///LOC10050598 |             |               | 204992_s_at | PFN2            | 208451_s_at | C4A///C4B///C4B_2          | 206373_at   | ZIC1            | 203764_at   | DLGAP5          |
| 208083_s_at | 4                          |             |               | 205030_at   | FABP7           | 208727_s_at | CDC42                      | 206560_s_at | MIA             | 203954_x_at | CLDN3           |
| 208451_s_at | C4A///C4B///C4B_2          |             |               | 205047_s_at | ASNS            | 209301_at   | CA2                        | 207414_s_at | PCSK6           | 203962_s_at | NEBL            |

|             |           |             |                               |             |         |             |                   |             |           |
|-------------|-----------|-------------|-------------------------------|-------------|---------|-------------|-------------------|-------------|-----------|
| 208490_x_at | HIST1H2BF | 205051_s_at | KIT                           | 209357_at   | CITED2  | 207469_s_at | PIR               | 203973_s_at | CEBPD     |
| 208727_s_at | CDC42     | 205120_s_at | SGCB                          | 212492_s_at | KDM4B   | 208451_s_at | C4A///C4B///C4B_2 | 204014_at   | DUSP4     |
| 209301_at   | CA2       | 205242_at   | CXCL13                        | 212593_s_at | PDCD4   | 208490_x_at | HIST1H2BF         | 204041_at   | MAOB      |
| 209357_at   | CITED2    | 205573_s_at | SNX7                          | 213050_at   | COBL    | 208727_s_at | CDC42             | 204162_at   | NDC80     |
| 209369_at   | ANXA3     | 205862_at   | GREB1                         | 214079_at   | DHRS2   | 209301_at   | CA2               | 204351_at   | S100P     |
| 210387_at   | HIST1H2BG | 205890_s_at | GABBR1///UBD                  | 218331_s_at | FAM208B | 209357_at   | CITED2            | 204400_at   | EFS       |
| 210397_at   | DEFB1     | 206042_x_at | SNRPN///SNURF                 | 218694_at   | ARMCX1  | 209369_at   | ANXA3             | 204862_s_at | NME3      |
| 210512_s_at | VEGFA     | 206373_at   | ZIC1                          | 219850_s_at | EHF     | 210387_at   | HIST1H2BG         | 204863_s_at | IL6ST     |
| 212013_at   | PXDN      | 206560_s_at | MIA                           | 219922_s_at | LTBP3   | 210397_at   | DEFB1             | 204913_s_at | SOX11     |
| 212492_s_at | KDM4B     | 207414_s_at | PCSK6                         | 221589_s_at | ALDH6A1 | 211654_x_at | HLA-DQB1          | 204992_s_at | PFN2      |
| 212563_at   | BOP1      | 207469_s_at | PIR                           | 221675_s_at | CHPT1   | 212013_at   | PXDN              | 205916_at   | S100A7    |
| 212593_s_at | PDCD4     | 207980_s_at | CITED2<br>ITGB6///LOC10050598 |             |         | 212492_s_at | KDM4B             | 206373_at   | ZIC1      |
| 212730_at   | SYNM      | 208083_s_at | 4                             |             |         | 212496_s_at | KDM4B             | 206834_at   | HBD///HBD |
| 212998_x_at | HLA-DQB1  | 208451_s_at | C4A///C4B///C4B_2             |             |         | 212563_at   | BOP1              | 207076_s_at | ASS1      |
| 213050_at   | COBL      | 208490_x_at | HIST1H2BF                     |             |         | 212593_s_at | PDCD4             | 207843_x_at | CYB5A     |
| 214079_at   | DHRS2     | 208711_s_at | CCND1                         |             |         | 212730_at   | SYNM              | 208051_s_at | PAIP1     |
| 218694_at   | ARMCX1    | 208727_s_at | CDC42                         |             |         | 212998_x_at | HLA-DQB1          | 208654_s_at | CD164     |
| 219850_s_at | EHF       | 209301_at   | CA2                           |             |         | 213050_at   | COBL              | 208933_s_at | LGALS8    |
| 219922_s_at | LTBP3     | 209357_at   | CITED2                        |             |         | 214079_at   | DHRS2             | 208941_s_at |           |
| 221589_s_at | ALDH6A1   | 209369_at   | ANXA3                         |             |         | 217838_s_at | EVL               | 209008_x_at | KRT8      |
| 221675_s_at | CHPT1     | 209466_x_at | PTN                           |             |         | 218331_s_at | FAM208B           | 209194_at   | CETN2     |
| 221795_at   | NTRK2     | 209835_x_at | CD44                          |             |         | 218694_at   | ARMCX1            | 209603_at   | GATA3     |
| 221796_at   | NTRK2     | 210239_at   | IRX5                          |             |         | 219850_s_at | EHF               | 209610_s_at | SLC1A4    |
|             |           | 210387_at   | HIST1H2BG                     |             |         | 219922_s_at | LTBP3             | 209699_x_at | AKR1C2    |
|             |           | 210397_at   | DEFB1                         |             |         | 221589_s_at | ALDH6A1           | 210239_at   | IRX5      |
|             |           | 210512_s_at | VEGFA                         |             |         | 221675_s_at | CHPT1             | 210397_at   | DEFB1     |
|             |           | 211654_x_at | HLA-DQB1                      |             |         | 221796_at   | NTRK2             | 211074_at   | ---       |
|             |           | 212013_at   | PXDN                          |             |         |             |                   | 212063_at   | CD44      |
|             |           | 212492_s_at | KDM4B                         |             |         |             |                   | 212239_at   | PIK3R1    |
|             |           | 212510_at   | GPD1L                         |             |         |             |                   | 212442_s_at | CERS6     |
|             |           | 212563_at   | BOP1                          |             |         |             |                   | 212496_s_at | KDM4B     |
|             |           | 212593_s_at | PDCD4                         |             |         |             |                   | 212531_at   | LCN2      |
|             |           | 212730_at   | SYNM                          |             |         |             |                   | 212771_at   |           |

212998\_x\_at HLA-DQB1  
213050\_at COBL  
214079\_at DHRS2  
215440\_s\_at BEX4  
218162\_at OLFML3  
218331\_s\_at FAM208B  
218694\_at ARMCX1  
218847\_at IGF2BP2  
219850\_s\_at EHF  
219922\_s\_at LTBP3  
221589\_s\_at ALDH6A1  
221675\_s\_at CHPT1  
221795\_at NTRK2  
221796\_at NTRK2

213357\_at GTF2H5  
213587\_s\_at ATP6V0E2  
214370\_at S100A8  
214709\_s\_at KTN1  
217234\_s\_at EZR  
218027\_at MRPL15  
218194\_at REXO2  
218640\_s\_at PLEKHF2  
218773\_s\_at MSRB2  
219148\_at  
219192\_at UBAP2  
219359\_at ATHL1  
219681\_s\_at RAB11FIP1  
219983\_at HRASLS  
220414\_at CALML5  
220625\_s\_at ELF5  
33323\_r\_at SFN  
74694\_s\_at RABEP2  
AFFX.r2.Ec.bioC.5\_at ---
